# Supplementary material for: Nurses’ personality traits and decision-making as factors related to missed nursing care: a structural equation modeling approach
Source: Research Square preprint supplement (doi:10.21203/rs.3.rs-6710440/v1), 2025-06-18
Supplement: Supplementary file 1 [file 61255e72c3852f5ed082a76a.docx]

Table 1 – Sociodemographic and professional characteristics of the participants (*n* = 296).

| **Variable** | | **N (%)** | **Mean** | **Standard deviation** | **Minimum** | **Maximum** | **N Missed (%)** |
| --- | --- | --- | --- | --- | --- | --- | --- |
| Age (years) | | 296 (100) | 39.45 | 9.50 | 23 | 65 | 0 (0) |
| Experience as a nurse (years) | | 295 (99.66) | 16.22 | 9.46 | 1 | 41 | 1 (0.34) |
| Experience in the current patient care unit (years) | | 294 (99.32) | 11.67 | 9.54 | 0 | 35 | 2 (0.68) |
| **Variable** | | **N (%)** | **N Missed (%)** |  | |  |  |
| Gender | Male | 41 (13.9) | 0 (0) |  | | | |
| Female | 255 (86.1) |
| Marital status | Single | 115 (38.9) | 0 (0) |
| Civil partnership | 27 (9.1) |
| Married | 141 (47.6) |
| Divorced | 11 (3.7) |
| Widowed | 2 (0.7) |
| Education level | *Bacharelato*  Bachelor’s degree  Master’s degree  Doctoral degree | 2 (0.7)  241 (81.7)  52 (17.6)  0 (0) | 0 (0) |
| Unit | Medicine  Surgery | 129 (43.3)  165 (55.4) | 4 (1.3) |
| Shift most often worked | Morning | 65 (22) | 0 (0) |
| Afternoon | 10 (3.4) |
| Night | 1 (0.3) |
| Rotating | 220 (74.3) |
| Worked hours per week | 30 hours  35 hours  40 hours | 50 (16.9)  195 (66.1)  49 (16.4) | 2 (06). |
| Overtime  (quarterly) | None | 53 (18) | 0 (0) |  | | | | |
| 1-20 hours | 157 (53.2) |
| 20-50 hours | 67 (22.7) |
| More than 50 hours | 18 (6.1) |

Table 2 – Correlation coefficients among variables (*n* = 296).

|  | **1** | **2** | **3** | **4** | **5** | **6** | **7** | **8** | **9** | **10** | **11** | **12** | **13** | **14** | **15** | **16** | **17** | **18** | **19** | **20** | **21** | **22** |
| --- | --- | --- | --- | --- | --- | --- | --- | --- | --- | --- | --- | --- | --- | --- | --- | --- | --- | --- | --- | --- | --- | --- |
| **Missed Nursing Care** | 1 |  |  |  |  |  |  |  |  |  |  |  |  |  |  |  |  |  |  |  |  |  |
| Instrumental care | 0.818** | 1 |  |  |  |  |  |  |  |  |  |  |  |  |  |  |  |  |  |  |  |  |
| Patient assessment and documentation | 0.732** | 0.688** | 1 |  |  |  |  |  |  |  |  |  |  |  |  |  |  |  |  |  |  |  |
| Timeliness of response to patient/team | 0.710** | 0.547** | 0.366** | 1 |  |  |  |  |  |  |  |  |  |  |  |  |  |  |  |  |  |  |
| Patient empowerment/autonomy care | 0.779** | 0.612** | 0.532** | 0.451** | 1 |  |  |  |  |  |  |  |  |  |  |  |  |  |  |  |  |  |
| Efficacy of feeding and medication | 0.670** | 0.345** | 0.304** | 0.333** | 0.404** | 1 |  |  |  |  |  |  |  |  |  |  |  |  |  |  |  |  |
| **MNC-related factors** | 0.188** | 0.181** | 0.113 | 0.161** | 0.185** | 0.134* | 1 |  |  |  |  |  |  |  |  |  |  |  |  |  |  |  |
| Material resources | 0.107 | 0.125* | 0.071 | 0.116* | 0.061 | 0.092 | 0.725** | 1 |  |  |  |  |  |  |  |  |  |  |  |  |  |  |
| Patient volume and acuity | 0.111 | 0.080 | 0.111 | 0.030 | 0.141* | 0.111 | 0.619** | 0.263** | 1 |  |  |  |  |  |  |  |  |  |  |  |  |  |
| Management and organization | 0.058 | 0.109 | 0.060 | 0.022 | 0.101 | 0.032 | 0.726** | 0.514** | 0.264** | 1 |  |  |  |  |  |  |  |  |  |  |  |  |
| Staffing | 0.104 | 0.014 | -0.022 | 0.121* | 0.137* | 0.125* | 0.644** | 0.311** | 0.380** | 0.266** | 1 |  |  |  |  |  |  |  |  |  |  |  |
| Team communication | 0.242** | 0.284** | 0.207** | 0.248** | 0.195** | 0.047 | 0.582** | 0.404** | 0.209** | 0.473** | 0.120* | 1 |  |  |  |  |  |  |  |  |  |  |
| **Decision-making** | -0.050 | -0.043 | -0.022 | -0.016 | -0.050 | -0.032 | 0.011 | 0.035 | 0.068 | 0.017 | -0.034 | -0.081 | 1 |  |  |  |  |  |  |  |  |  |
| Data collection | -0.159** | -0.173** | -0.147* | -0.093 | -0.155** | -0.104 | -0.133* | -0.118* | -0.060 | -0.079 | -0.094 | -.0137* | 0.447** | 1 |  |  |  |  |  |  |  |  |
| Data processing and identification of nursing problems | -0.113 | -0.088 | -0.076 | -0.023 | -0.121* | -0.077 | 0.078 | 0.083 | 0.007 | 0.075 | 0.090 | -0.045 | 0.440** | 0.131* | 1 |  |  |  |  |  |  |  |
| Plans of action | -0.074 | -0.086 | -0.163** | -0.014 | -0.040 | 0.022 | 0.021 | 0.063 | 0.057 | -0.033 | 0.026 | -0.028 | 0.453** | 0.011 | 0.101 | 1 |  |  |  |  |  |  |
| Implementation, monitoring, and evaluation | 0.096 | 0.114 | 0.168** | 0.061 | 0.079 | 0.012 | 0.022 | 0.004 | 0.094 | 0.020 | -0.010 | -0.039 | 0.732** | 0.057 | 0.105 | 0.112 | 1 |  |  |  |  |  |
| **Personality traits** |  |  |  |  |  |  |  |  |  |  |  |  |  |  |  |  |  |  |  |  |  |  |
| Agreeableness | 0.014 | 0.018 | -0.020 | 0.054 | 0.076 | -0.038 | 0.029 | -0.022 | 0.046 | 0.002 | 0.027 | 0.038 | 0.058 | 0.022 | 0.027 | 0.045 | 0.048 | 1 |  |  |  |  |
| Extraversion | 0.061 | 0.078 | 0.083 | -0.004 | 0.125* | -0.037 | 0.021 | 0.011 | -0.028 | 0.008 | 0.029 | 0.037 | 0.114 | 0.050 | 0.008 | 0.030 | 0.149* | 0.534** | 1 |  |  |  |
| Conscientiousness | 0.170** | 0.111 | 0.117* | 0.105 | 0.132* | 0.154** | -0.062 | -0.016 | -0.106 | -0.076 | 0.019 | 0.009 | 0.061 | 0.087 | -0.050 | -0.048 | 0.106 | 0.114 | 0.213** | 1 |  |  |
| Emotional stability | 0.056 | 0.037 | 0.067 | 0.067 | 0.034 | 0.010 | 0.113 | 0.015 | 0.125* | 0.060 | 0.068 | 0.161** | 0.120* | 0.056 | 0.051 | 0.023 | 0.087 | 0.181** | 0.076 | 0.172** | 1 |  |
| Openness to experience | 0.119* | 0.150* | 0.139* | 0.012 | 0.131* | 0.044 | 0.069 | 0.056 | -0.017 | -0.006 | 0.118* | 0.023 | 0.148* | 0.078 | -0.031 | 0.013 | 0.189** | 0.374** | 0.632** | 0.274** | 0.184** | 1 |

Note: **p*<0.05; ***p*<0.001.

Table 3 – Direct effects among parameters (*n* = 296).

|  | **Standardized effects** | **Standard Error** | **Significance level** | **95% CI** |
| --- | --- | --- | --- | --- |
| **Structural model** | | | | |
| Missed nursing care (MNC)←Decision-making | -0.16 | 0.07 | 0.03* | -0.30 to -0.02 |
| Missed nursing care (MNC)←Personality traits | 0.14 | 0.06 | 0.03* | 0.01 to 0.26 |
| Missed nursing care (MNC)← MNC-related factors | 0.27 | 0.08 | 0.001* | 0.12 to 0.43 |
| Decision-making←Personality traits | 0.06 | 0.08 | 0.44 | -0.09 to 0.21 |
| Decision-making← MNC-related factors | 0.10 | 0.07 | 0.17 | -0.04 to 0.25 |
| **Measurement model** | | | | |
| Instrumental care←MNC | 0.85 | 0.04 | <0.001* | 0.78 to 0.92 |
| Patient assessment and documentation←MNC | 0.70 | 0.05 | <0.001* | 0.61 to 0.79 |
| Timeliness of response to patient/team←MNC | 0.64 | 0.04 | <0.001* | 0.55 to 0.73 |
| Patient empowerment/autonomy care←MNC | 0.75 | 0.03 | <0.001* | 0.68 to 0.81 |
| Efficacy of feeding and medication←MNC | 0.42 | 0.06 | <0.001* | 0.30 to 0.54 |
| Agreeableness←Personality traits | 0.57 | 0.04 | <0.001* | 0.48 to 0.66 |
| Extraversion←Personality traits | 0.87 | 0.04 | <0.001* | 0.79 to 0.95 |
| Conscientiousness←Personality traits | 0.29 | 0.06 | <0.001* | 0.16 to 0.41 |
| Emotional stability←Personality traits | 0.14 | 0.06 | 0.01* | 0.03 to 0.25 |
| Openness to experience←Personality traits | 0.73 | 0.04 | <0.001* | 0.66 to 0.80 |
| Material resources← MNC-related factors | 0.71 | 0.04 | <0.001* | 0.63 to 0.79 |
| Patient volume and acuity← MNC-related factors | 0.40 | 0.06 | <0.001* | 0.29 to 0.51 |
| Management and organization← MNC-related factors | 0.77 | 0.04 | <0.001* | 0.69 to 0.84 |
| Staffing← MNC-related factors | 0.41 | 0.06 | <0.001* | 0.30 to 0.53 |
| Team communication← MNC-related factors | 0.65 | 0.05 | <0.001* | 0.55 to 0.74 |
| Data processing and identification of nursing problems←Decision-making | 0.85 | 0.30 | 0.004* | 0.26 to 1.42 |
| Data collection←Decision-making | 0.24 | 0.11 | 0.03* | 0.01 to 0.46 |
| Plans of action←Decision-making | 0.16 | 0.09 | 0.07 | -0.01 to 0.33 |
| Implementation, monitoring and evaluation←Decision-making | 0.16 | 0.08 | 0.05* | -0.004 to 0.32 |

*Note*. Due to the metric differences between the instruments, standardized direct effects should be preferred to indicate the strength of the correlations (magnitude between -1.0 and +1.0). Higher absolute values indicate stronger (positive or negative) correlations.
